# Supplementary material for: Fecal Lcn-2 level is a sensitive biological indicator for gut dysbiosis and intestinal inflammation in multiple sclerosis
Source: PubMed Central journal article supplement (PMC9634083; doi:10.3389/fimmu.2022.1015372), 2022-10-21
Supplement: DataSheet_1.pdf [file DataSheet_1.pdf]

Supplementary Material

● HD ● MS

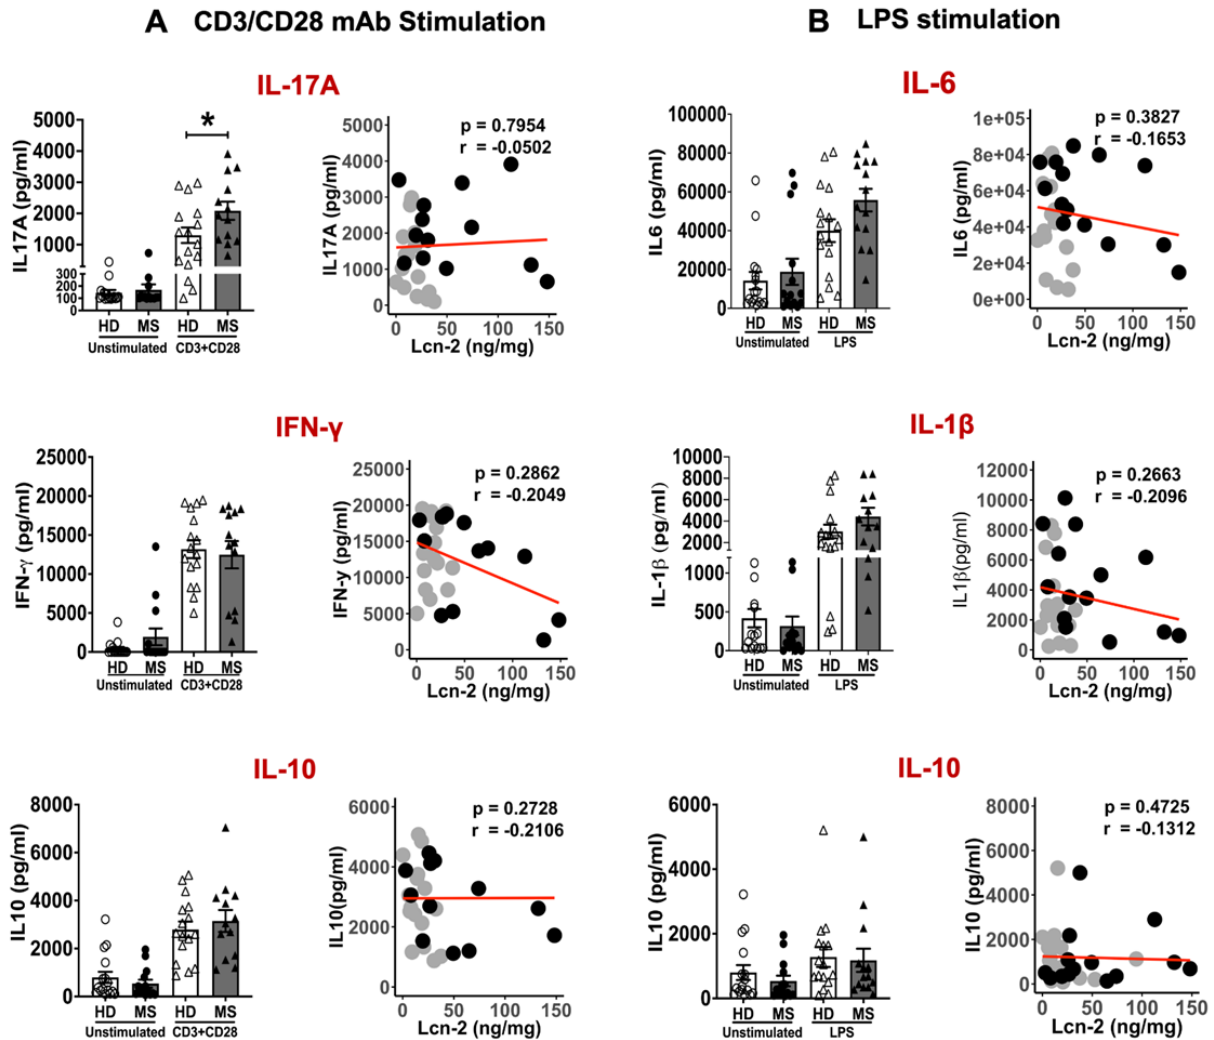

Supplementary Figure 1. Cytokine production by PBMC in HDs and RRMS patients.

(A) Production of IL17A, IFN- $\gamma$ , and IL10 in PBMCs isolated from HDs and RRMS patients with/without CD3/CD28 Abs stimulation, and their correlation with fecal Lcn-2 levels. (B) Production of IL6, IL1 $\beta$  and IL10 in PBMC isolated from HDs and RRMS patients with/without LPS stimulation, and their correlation with fecal Lcn-2 levels. Mean  $\pm$  SEM. \*P < 0.05.

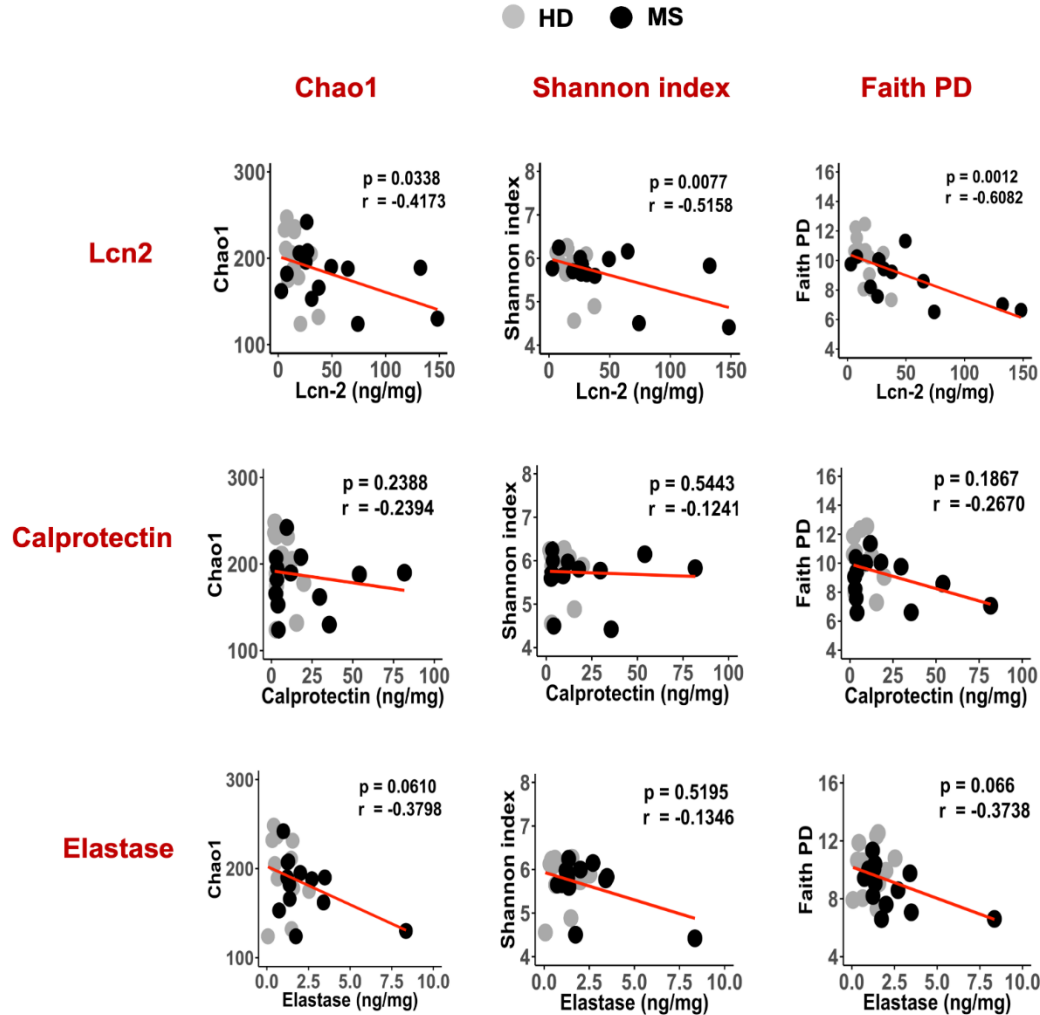

**Supplementary Figure 2. Correlation between gut inflammation markers and alpha diversity.**

Spearman correlations between alpha diversity (Chao1, Shannon index, and Faith PD) and Lcn-2, calprotectin, and elastase are shown. Each dot represents an individual subject. HDs; n=13, RRMS; n=13.

● HD ● MS

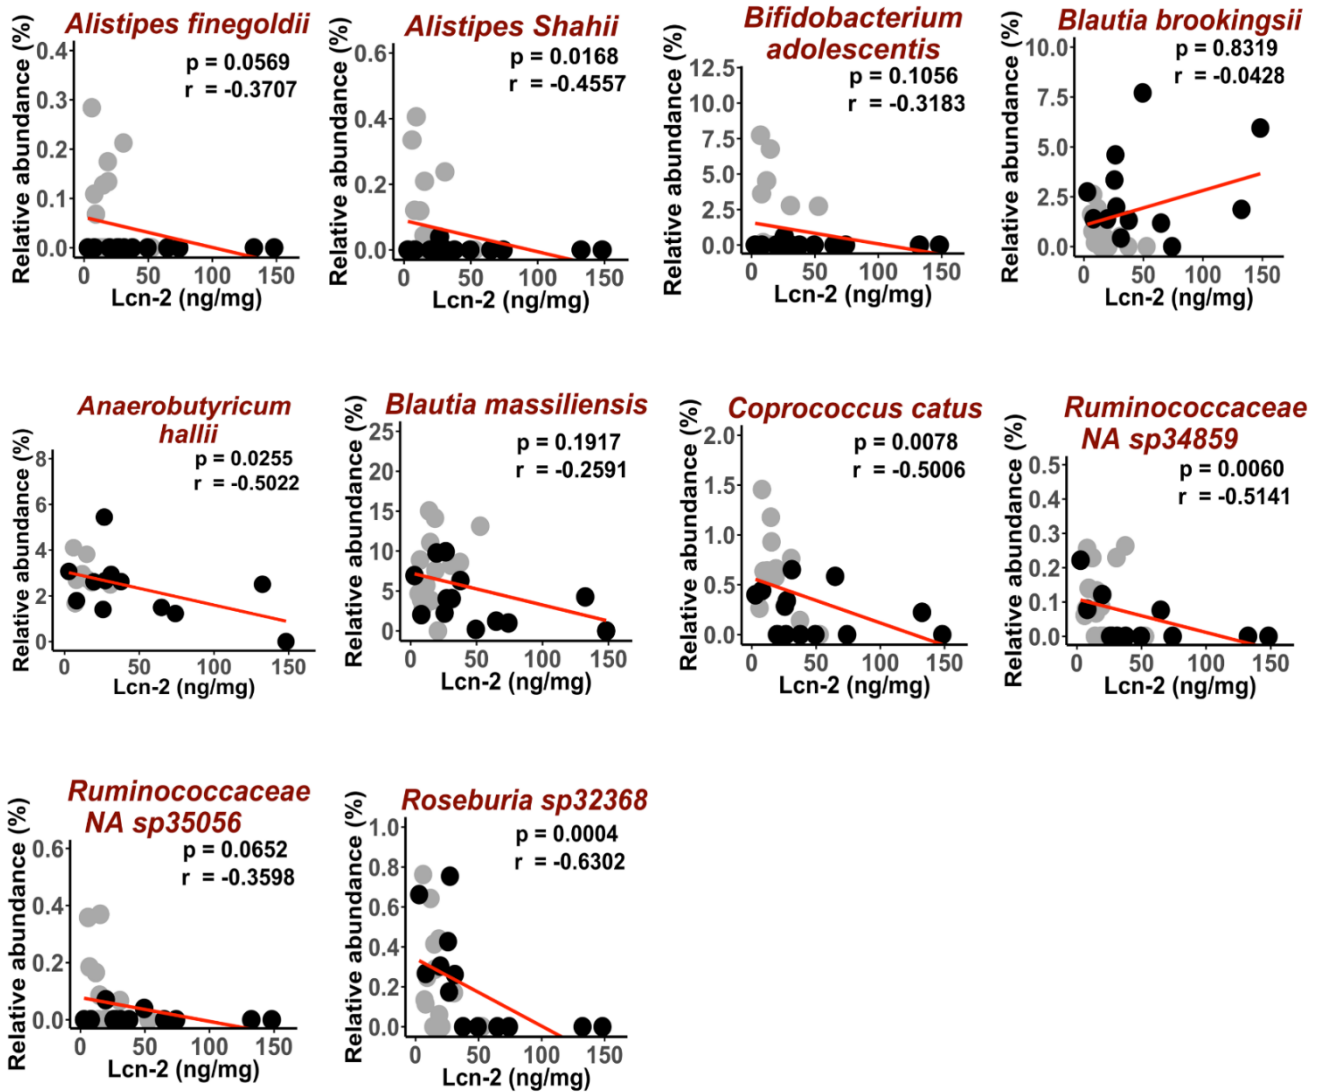

**Supplementary Figure 3. Correlation between fecal Lcn-2 levels and RRMS-associated enteric bacteria.** Spearman correlation between fecal Lcn-2 and bacterial taxa; *Alistipes finegoldii*, *Alistipes shahii*, *Bifidobacterium adolescentis*, *Blautia brookingsii*, *Anaerobutyricum (Eubacterium) hallii*, *Blautia massiliensis*, *Coprococcus catus*, *Ruminococcaceae NA sp 34859*, *Ruminococcaceae NA sp 35056*, and *Roseburia sp32368*. Each dot represents an individual subject.

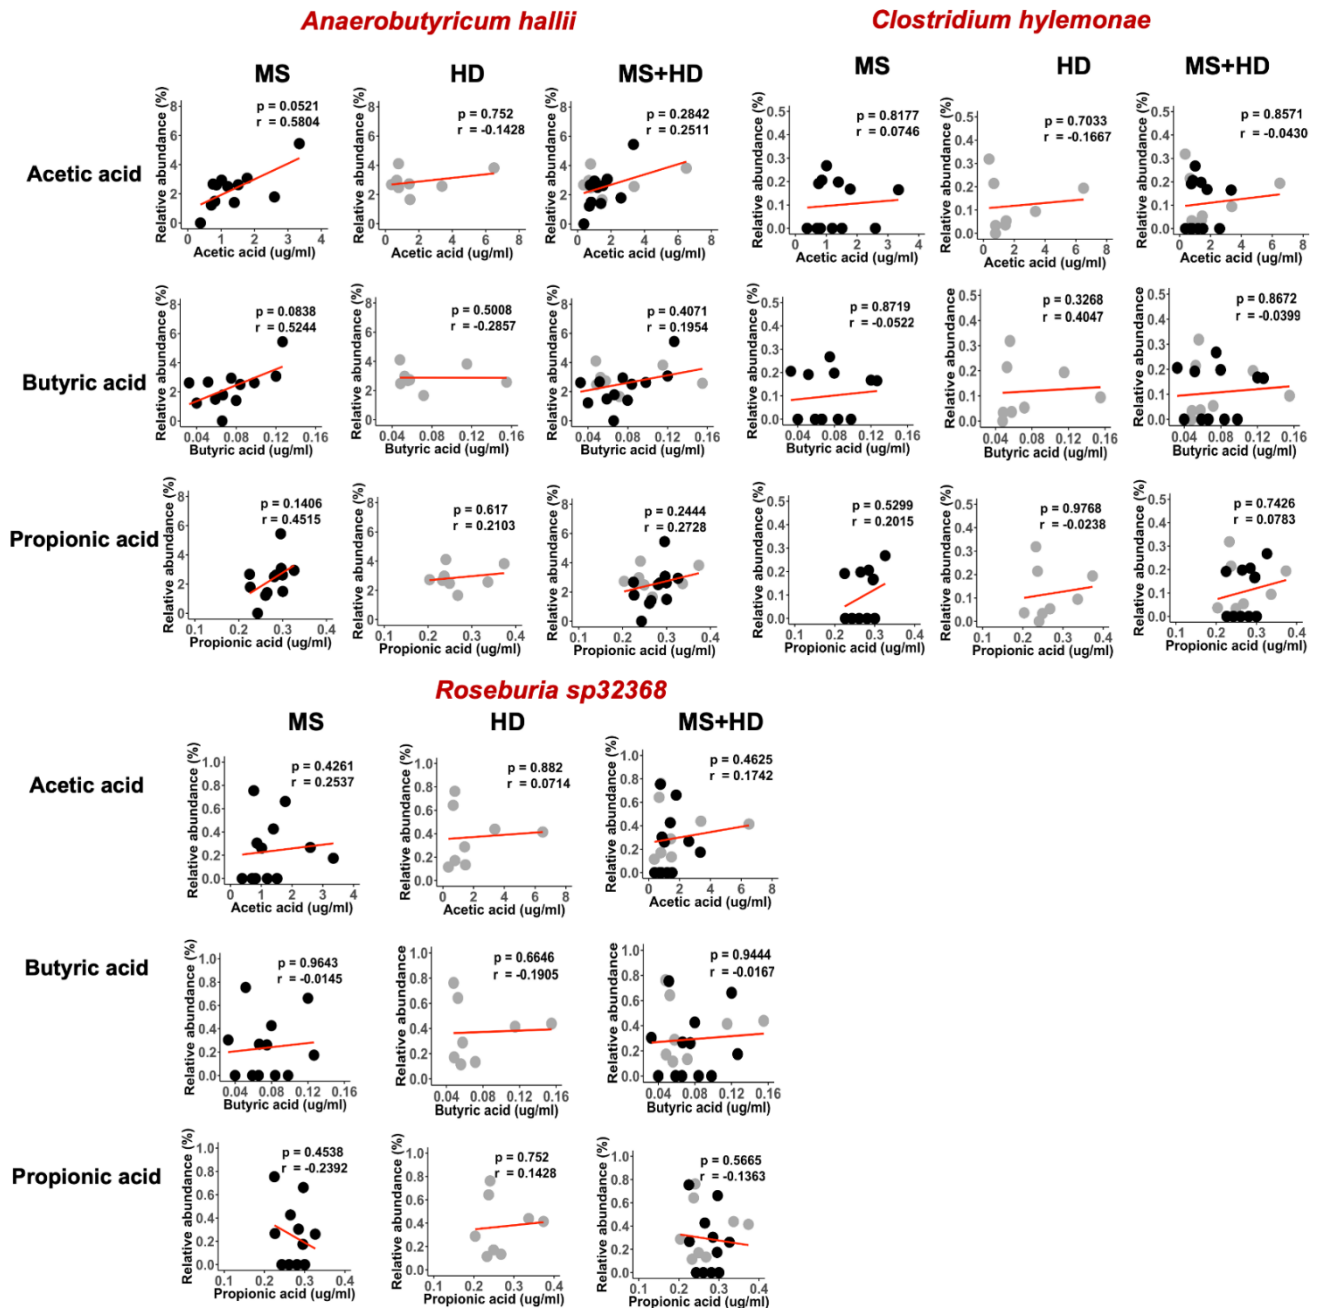

**Supplementary Figure 4. Association of MS-associated bacteria with serum SCFAs levels.**

Correlation of *Anaerobutyricum (Eubacterium) hallii*, *Clostridium hylemonae*, and *Roseburia sp 32368* with serum acetic acid, butyric acid, or propionic acid levels. HDs; n=8, RRMS; n=12.
